# Supplementary material for: Risk factors for neurocognitive impairment and the relation with structural brain abnormality in children and young adults with severe chronic kidney disease
Source: PubMed Central journal article supplement (PMC10154258; doi:10.1007/s00467-022-05781-1), 2022-11-02
Supplement: 467_2022_5781_MOESM2_ESM.pdf [file 467_2022_5781_MOESM2_ESM.pdf]

## Supplement 2.

*Univariate regression analyses on associations between CKD parameters and neurocognitive functioning*

| Outcome variable                  | Predictors                                    | Statistics  |         |                 |
|-----------------------------------|-----------------------------------------------|-------------|---------|-----------------|
|                                   |                                               | B (SE)      | $\beta$ | P               |
| eFSIQ                             | Age at CKD diagnosis (years)                  | -.01 (.51)  | -.002   | -.991           |
|                                   | eGFR (ml/min/1.73 m <sup>2</sup> )            | -.18 (.17)  | -.198   | .313            |
|                                   | Duration severe CKD (% of life)               | -.12        | -.122   | .536            |
|                                   | Dialysis duration (% of life)                 | -1.88 (.70) | -.464   | <b>.013</b>     |
|                                   | Time since kidney transplantation (% of life) | -.27 (.18)  | -.288   | <b>.138</b>     |
|                                   |                                               |             |         |                 |
| Processing Speed & Working Memory | Age at CKD diagnosis (years)                  | -.05 (.02)  | -.364   | <b>.057</b>     |
|                                   | eGFR (ml/min/1.73 m <sup>2</sup> )            | .00 (.01)   | .048    | .810            |
|                                   | Duration severe CKD (% of life)               | .01 (.01)   | .135    | .494            |
|                                   | Dialysis duration (% of life)                 | -.13 (.03)  | -.653   | <b>&lt;.001</b> |
|                                   | Time since kidney transplantation (% of life) | .00 (.01)   | .022    | .913            |
| Verbal Fluency                    | Age at CKD diagnosis (years)                  | .01 (.03)   | .039    | .846            |
|                                   | eGFR (ml/min/1.73 m <sup>2</sup> )            | -.01 (.01)  | -.209   | .287            |
|                                   | Duration severe CKD (% of life)               | .00 (.01)   | .105    | .595            |
|                                   | Dialysis duration (% of life)                 | .01 (.04)   | .050    | .800            |
|                                   | Time since kidney transplantation (% of life) | -.00 (.01)  | -.058   | .771            |
| Verbal Memory                     | Age at CKD diagnosis (years)                  | .01 (.03)   | .062    | .755            |

|                                    |                                               |             |       |             |
|------------------------------------|-----------------------------------------------|-------------|-------|-------------|
|                                    | eGFR (ml/min/1.73 m <sup>2</sup> )            | -0.00 (.01) | -.079 | .691        |
|                                    | Duration severe CKD (% of life)               | -.02 (.01)  | -.348 | <b>.069</b> |
|                                    | Dialysis duration (% of life)                 | -.07 (.04)  | -.358 | <b>.061</b> |
|                                    | Time since kidney transplantation (% of life) | -.00 (.01)  | -.037 | .851        |
| Processing Speed, Switch & Control | Age at CKD diagnosis (years)                  | .02 (.02)   | .171  | .385        |
|                                    | eGFR (ml/min/1.73 m <sup>2</sup> )            | .01 (.01)   | .161  | .412        |
|                                    | Duration severe CKD (% of life)               | -.01 (.01)  | -.220 | .260        |
|                                    | Dialysis duration (% of life)                 | -.04 (.04)  | -.217 | .268        |
|                                    | Time since kidney transplantation (% of life) | -.00 (.01)  | -.057 | .773        |
| Switching                          | Age at CKD diagnosis (years)                  | .02 (.02)   | .191  | .329        |
|                                    | eGFR (ml/min/1.73 m <sup>2</sup> )            | .01 (.01)   | .198  | .312        |
|                                    | Duration severe CKD (% of life)               | -.01 (.01)  | -.120 | .544        |
|                                    | Dialysis duration (% of life)                 | -.03 (.04)  | -.146 | .459        |
|                                    | Time since kidney transplantation (% of life) | -.01 (.01)  | -.163 | .406        |

---

*Note.* Statistical values  $p < .200$  are shown in bold and these predictors were selected for further multivariate regression analyses. Abbreviations: CKD = Chronic kidney disease; eFSIQ = Estimation of age-standardized full-scale Intelligence Quotient; eGFR = estimated glomerular filtration rate; SE = Standard Error.
