# Supplementary material for: Risk factors for neurocognitive impairment and the relation with structural brain abnormality in children and young adults with severe chronic kidney disease
Source: PubMed Central journal article supplement (PMC10154258; doi:10.1007/s00467-022-05781-1), 2022-11-02
Supplement: 467_2022_5781_MOESM5_ESM.pdf [file 467_2022_5781_MOESM5_ESM.pdf]

Supplement 4.

*Univariate regression analyses on associations between aspects of brain structure and neurocognitive functioning*

| Outcome variable                  | Predictors retained in the model                                                                                      | Statistics                |         |                 |
|-----------------------------------|-----------------------------------------------------------------------------------------------------------------------|---------------------------|---------|-----------------|
|                                   |                                                                                                                       | B (SE)                    | $\beta$ | P               |
| eFSIQ                             | Nucleus Accumbens volume (cm <sup>3</sup> )                                                                           | .00 (.00)                 | .085    | .691            |
|                                   | FA within the cluster of CKD-affected white matter tracts associated with eFSIQ                                       | 562.16<br>(84.61)         | .823    | <b>&lt;.001</b> |
|                                   | MD within the cluster of CKD-affected white matter tracts associated with eFSIQ (10 <sup>-5</sup> mm <sup>2</sup> /s) | -.41175.51<br>(169798.84) | -.053   | .811            |
| Processing Speed & Working Memory | Nucleus Accumbens volume (cm <sup>3</sup> )                                                                           | .00 (.00)                 | .090    | .675            |
|                                   | FA within the cluster of CKD-affected white matter tracts associated with eFSIQ                                       | 12.43 (6.77)              | .372    | <b>.080</b>     |
|                                   | MD within the cluster of CKD-affected white matter tracts associated with eFSIQ (10 <sup>-5</sup> mm <sup>2</sup> /s) | -5664.24<br>(8230.35)     | -.149   | .499            |

*Note.* Abbreviations: CKD = Chronic kidney disease; eFSIQ = Estimation of age-standardized full-scale Intelligence Quotient; FA = fractional anisotropy; MD = mean diffusivity; SE = Standard Error.
